# Supplementary material
Source: PubMed Central journal article supplement (PMC5077211)
Supplement: 10.1074_M116.733741_jbc.M116.733741-1.pdf [file 10.1074_M116.733741_jbc.M116.733741-1.pdf]

Impact of the motor and tail domains of class III myosins on regulating the formation and elongation of actin protrusions

**Manmeet H. Raval<sup>‡</sup>, Omar A. Quintero<sup>§</sup>, Meredith L. Weck<sup>¶</sup>, William C. Unrath<sup>‡</sup>, James W. Gallagher<sup>||</sup>, Runjia Cui<sup>‡‡</sup>, Bechara Kachar<sup>‡‡</sup>, Matthew J. Tyska<sup>¶</sup>, and Christopher M. Yengo<sup>‡1</sup>**

**Supplemental Video 1-4 Legend:**

**Filopodia dynamics of COS7 cells transfected with MYO3A, MYO3A,Δ31, MYO3A,Δ34 and MYO10 constructs.** COS7 cells transfected with (1) GFP-MYO3A, (2) GFP-MYO3A,Δ31, (3) GFP-MYO3A,Δ34 and (4) GFP-MYO10 were imaged using time-lapsed microscopy using a TiE inverted fluorescence microscope (Nikon Instruments). Image acquisition was managed through NIS-Elements software (Nikon Instruments). GFP-MYO3A expressing COS7 cells led to formation of robust and lengthy filopodia which remained stable for longer times compared to short and highly unstable filopodia formed by GFP-MYO3A,Δ31 and GFP-MYO3A,Δ34 expressing COS7 cells. Whereas, GFP-MYO10 expressing cells demonstrated filopodia with rapid dynamics (faster extension and retraction velocity compared to MYO3A). MYO3A (Movie-1) and MYO3A,Δ31 (Movie-2) were recorded at 0.5 frames per second (fps); MYO3A,Δ34 (Movie-3) was recorded at 1 fps; MYO10 (Movie-4) was recorded at 0.33 fps. Video 1-3 were compressed at 30 fps and Video 4 was compressed at 20 fps.
